# Supplementary material for: Assessment of the public health literacy based on the preferences of the general population of the Kingdom of Saudi Arabia, A strategy to improve public health
Source: Research Square preprint supplement (doi:10.21203/rs.3.rs-5712173/v1), 2025-01-01
Supplement: Supplementary file 1 [file 7a82a3ff568a938dbee78003.docx]

**Assessment of the public health literacy based on the preferences of the general population of the Kingdom of Saudi Arabia, A strategy to improve public health.**

# Section A: Socio-Demographic Data

# 1) Name:

# 2) City:

# 3) Nationality: Saudi Non-Saudi

# 4) Sex: a) Male b) Female

# 5) Age range: < 18 18-29 30-39 40-49 50-59 ≥ 60

# 6) Education Level:

# a) Middle school and below

# b) High school & Technical secondary school

# c) College

# d) Bachelor

# e) Master and above

# 7) Personal monthly income:

# a) < 2000 b) 2000 – 5000 c) 5000 – 10000 d) >10000

# 8) Current residence:

# a) City b) Villages and towns

# 9) Profession:

# a) Civil servant

# b) Teacher

# c) Professional and technical personnel

# d) Ordinary workers

# e) Media practitioners

# f) Service personnel

# g) Freelancer

# h) Farmers

# i) Students

# j) Stay-at-home mom/dad

# k) Retired

# l) Other professionals

# m) Unemployed

# Section B: Responsibility for Public Health Information

# Who do you expect to be responsible for providing you with adequate information regarding public health education?

#  Public health literacy service provider

#  Community, sub-district, etc. government department

#  Medical institution (Ministry of Health)

#  The media

# Section C: Health Literacy Providers**

#  One's own home

#  Large general hospital

#  Community health service stations

#  Any hospital close to home

#  Science museum

#  Community public places

#  Campus activity center

#  Enterprises

#  Network media

#  Communication with acquaintances

#  Community publicity board

#  Hospital bulletin board

#  Free clinics, lectures

#  Television, radio

#  Newspapers, magazines, books

#  Outpatient and ward medical education

# Section D: Channels to Obtain Health Literacy Through the Internet

#  Twitter

#  Facebook

#  Instagram

#  TikTok

#  Snapchat

#  YouTube

#  WhatsApp

#  Popular science websites

#  Video websites or apps

#  Search engines

#  News websites

#  Short video apps

#  Online education platforms

# Section E: Format of Internet Health Literacy Preferred by the Public

#  Articles with images

#  Short videos

#  Audio

#  Anime

#  Live streaming

#  Video games

#  Photography and painting

#  Infographics (data visualization)

#  Augmented reality

# **Section F: Health Content Topics of Interest**

# Surveillance

#  First aid

#  Cosmetic surgery

#  Nutrition

#  Mental health

#  Endocrine diseases

#  Chronic diseases

#  Children's health

#  Reproductive health

#  Medical technology

#  Traditional Prophet Medicine (TPM)

# Prevention

#  Tumors

#  Metabolic diseases

#  Cardiovascular diseases

#  Infectious diseases

#  Venereal diseases
